# Supplementary material for: Zn3V2O7(OH)2·2H2O/MXene cathode with fast ion diffusion for highly durable zinc ion batteries
Source: Royal Society of Chemistry journal article supplement (doi:10.1039/d4ra03730h), 2024-01-01
Supplement: d4ra03730h2.pdf [file d4ra03730h2.pdf]

## **Zn<sub>3</sub>V<sub>2</sub>O<sub>7</sub>(OH)<sub>2</sub>·2H<sub>2</sub>O/MXene Cathode with fast ion diffusion for Highly Durable Zinc Ion Battery**

Wanting Su<sup>†</sup>, Man Lang<sup>†</sup>, Weiwei Li, Huili Li\*

The Education Ministry Key Lab of Resource Chemistry, Shanghai Key Laboratory of Rare Earth Functional Materials, College of Chemistry and Materials Science, Shanghai Normal University, Shanghai 200234, P. R. China.

\*E-mail: li\_huili@shnu.edu.cn

<sup>†</sup>Wanting Su and Man Lang contributed equally to this work.

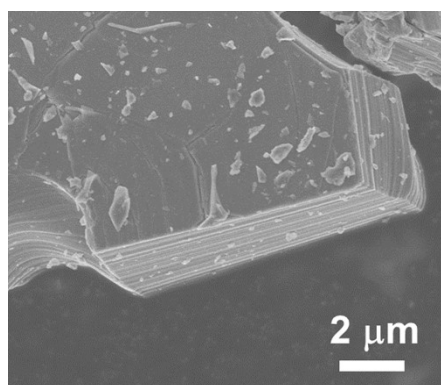

**Figure S1** SEM image of Ti<sub>3</sub>AlC<sub>2</sub> MAX.

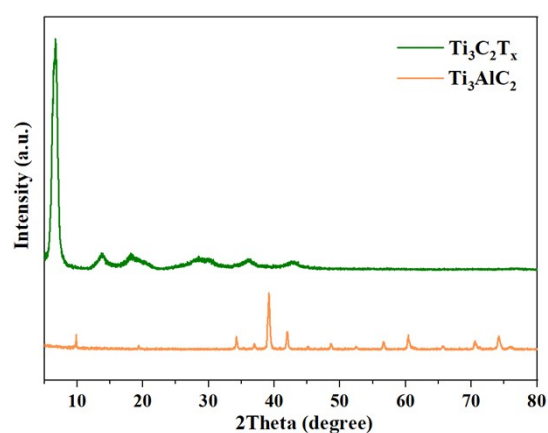

**Figure S2** XRD patterns of Ti<sub>3</sub>AlC<sub>2</sub> and Ti<sub>3</sub>C<sub>2</sub>T<sub>x</sub> MXene.

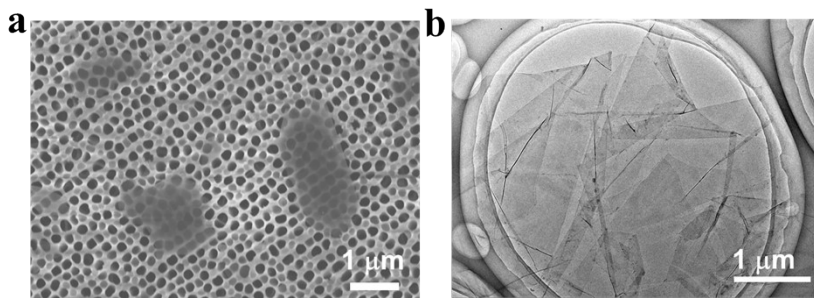

**Figure S3** (a) SEM and TEM image of  $\text{Ti}_3\text{C}_2\text{T}_x$  MXene.

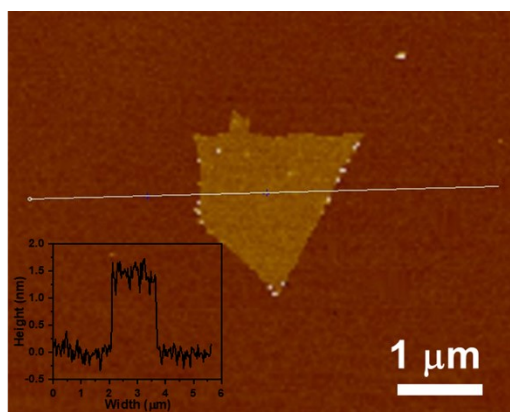

**Figure S4** Atomic Force Microscope of  $\text{Ti}_3\text{C}_2\text{T}_x$  MXene.

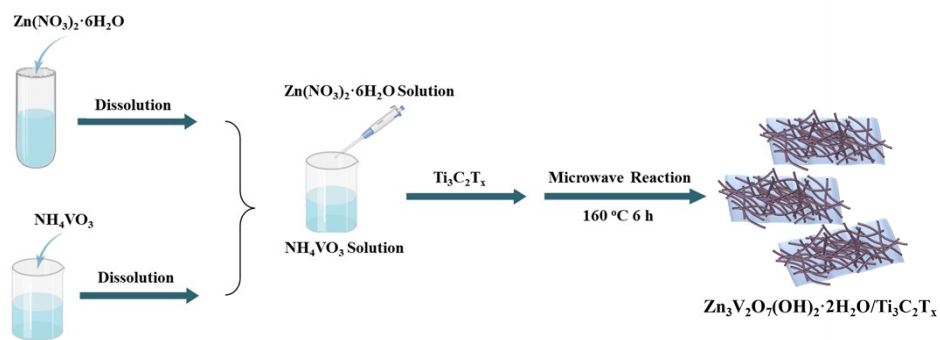

**Figure S5** The synthesis process of ZVO/ $\text{Ti}_3\text{C}_2\text{T}_x$  composites.

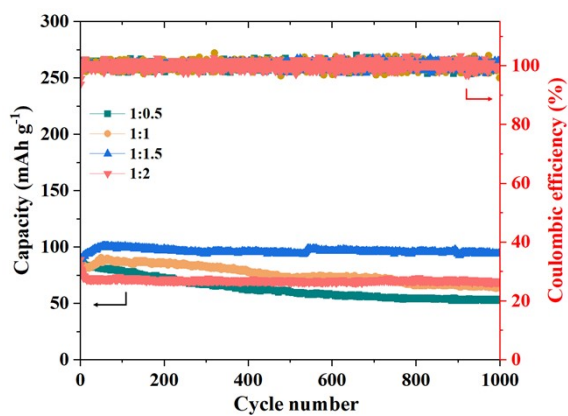

**Figure S6** The cycling stability of ZVO/Ti<sub>3</sub>C<sub>2</sub>T<sub>x</sub> electrodes synthesized from different molar ratio of NH<sub>4</sub>VO<sub>3</sub> and Zn(NO<sub>3</sub>)<sub>2</sub>·6H<sub>2</sub>O.

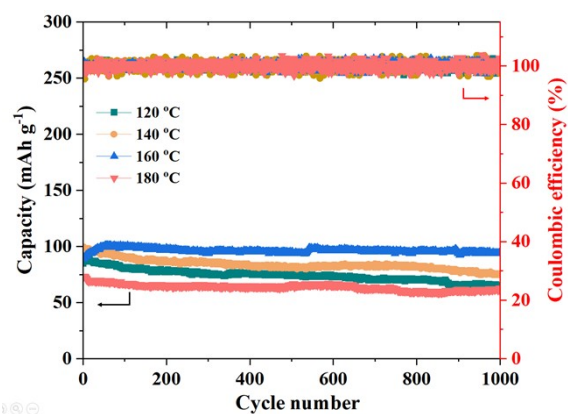

**Figure S7** The cycling stability of ZVO/Ti<sub>3</sub>C<sub>2</sub>T<sub>x</sub> electrodes synthesized from different microwave reaction temperature.

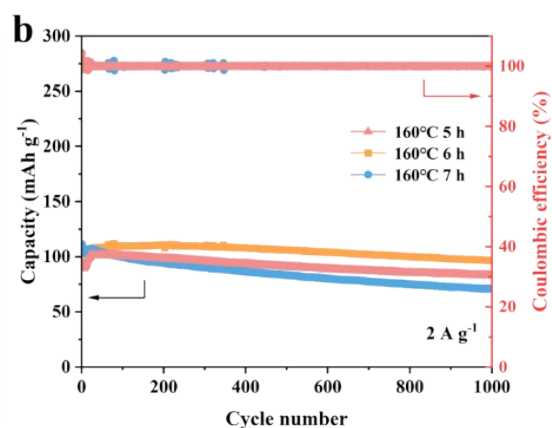

**Figure S8** The cycling stability of ZVO/Ti<sub>3</sub>C<sub>2</sub>T<sub>x</sub> electrodes synthesized from different microwave reaction time.

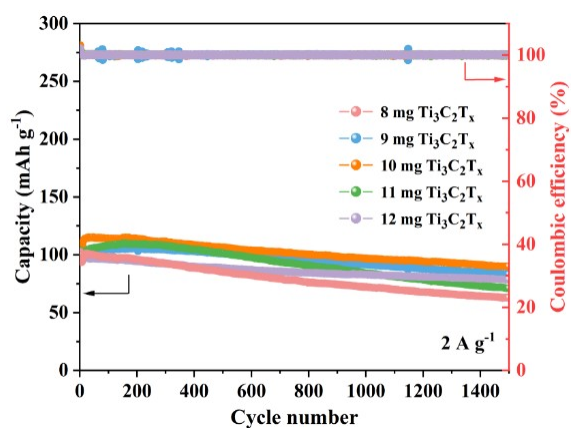

**Figure S9** The cycling stability of ZVO/Ti<sub>3</sub>C<sub>2</sub>T<sub>x</sub> electrodes synthesized from different mass of Ti<sub>3</sub>C<sub>2</sub>T<sub>x</sub>.

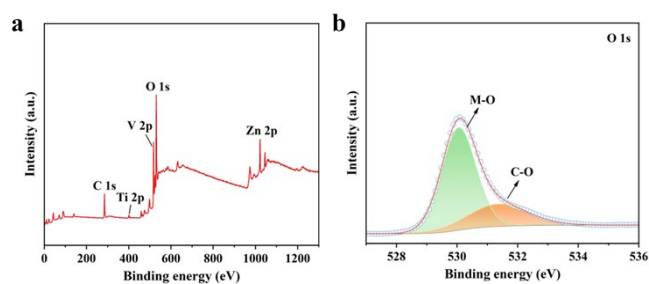

**Figure S10** (a) XPS spectrum of ZVO/Ti<sub>3</sub>C<sub>2</sub>T<sub>x</sub> MXene. (b) The high-resolution XPS spectrum of O 1s in the (a).

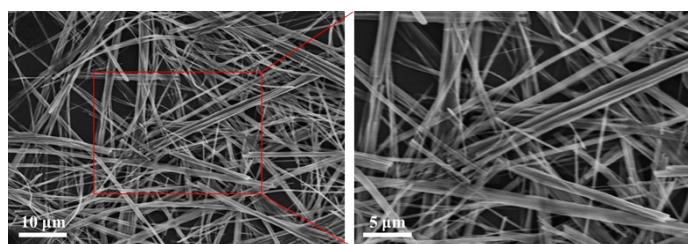

**Figure S11** SEM images of ZVO.

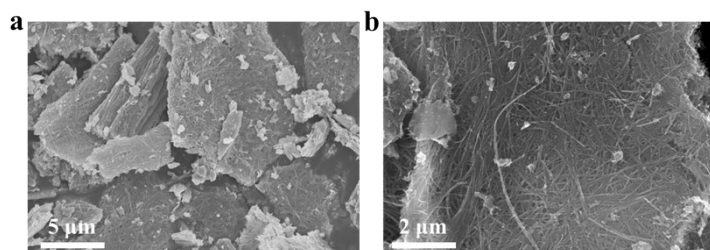

**Figure S12** SEM images ZVO/Ti<sub>3</sub>C<sub>2</sub>T<sub>x</sub> composites.

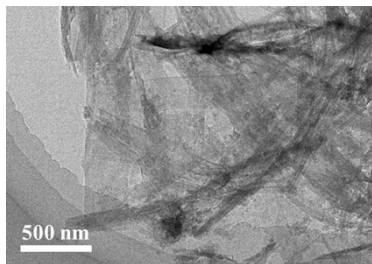

**Figure S13** TEM image of ZVO/Ti<sub>3</sub>C<sub>2</sub>T<sub>x</sub> composites.

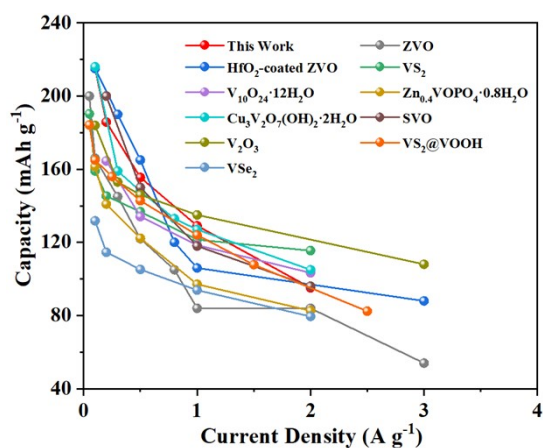

**Figure S14** The capacity of Zn//ZVO/Ti<sub>3</sub>C<sub>2</sub>T<sub>x</sub> batteries compared with the values reported of other similar vanadium-based ZIBs.

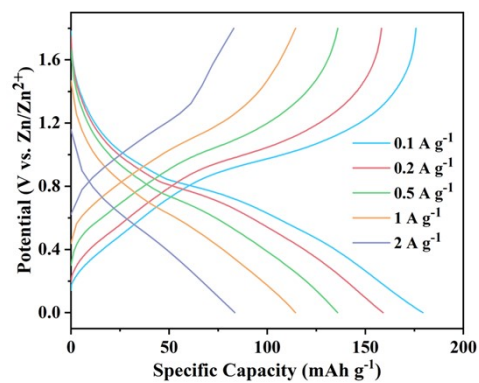

**Figure S15** The galvanotactic charge/discharge curves Zn//ZVO batteries under various current densities.

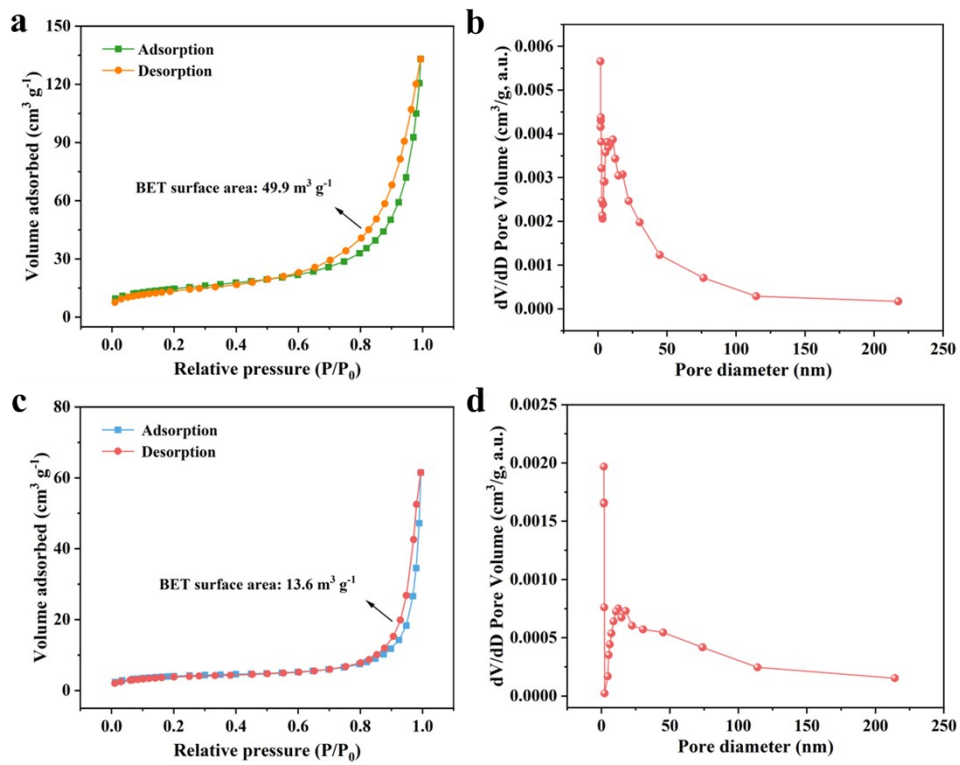

**Figure S16** (a) Nitrogen adsorption/desorption isotherms and (b) pore size distribution curves of  $ZVO/Ti_3C_2T_x$ . (a) Nitrogen adsorption/desorption isotherms and (b) pore size distribution curves of  $Zn_3V_2O_7(OH)_2$ .

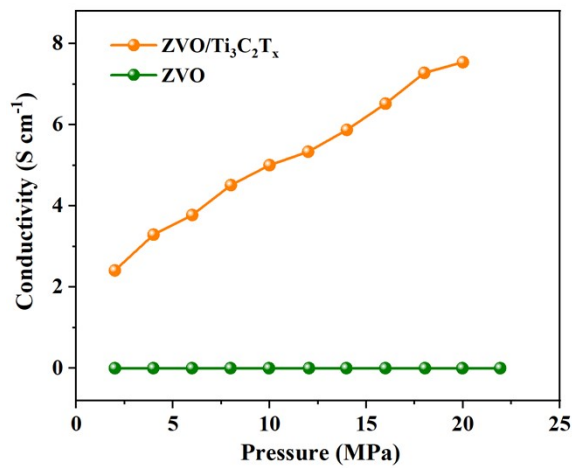

**Figure S17** Electronic conductivity of  $ZVO/Ti_3C_2T_x$  and  $ZVO$ .

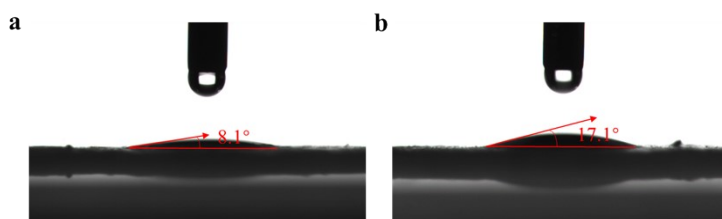

**Figure S18** Water contact angles of (a) ZVO/Ti<sub>3</sub>C<sub>2</sub>T<sub>x</sub> and (b) ZVO.

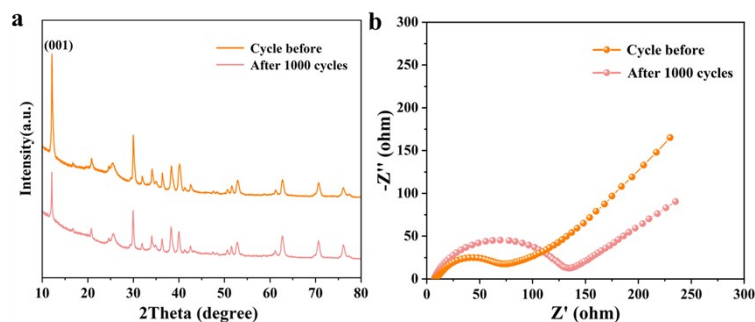

**Figure S19** (a) XRD and (b) Electrochemical impedance spectroscopy spectra of Zn//MoS<sub>2</sub>/Ti<sub>3</sub>C<sub>2</sub>T<sub>x</sub> batteries before and after charge/discharge cycles.

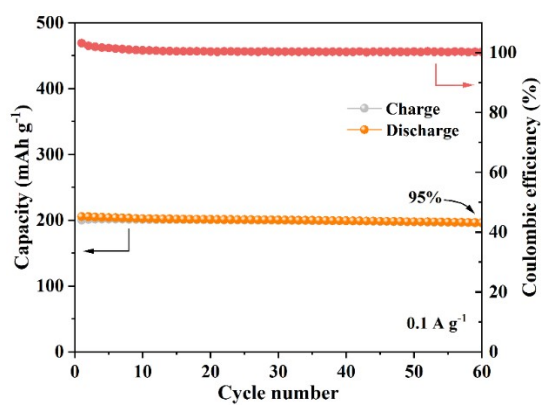

**Figure S20** Long cycling performance of Zn//ZVO/Ti<sub>3</sub>C<sub>2</sub>T<sub>x</sub> batteries at 0.1 A g<sup>-1</sup>.

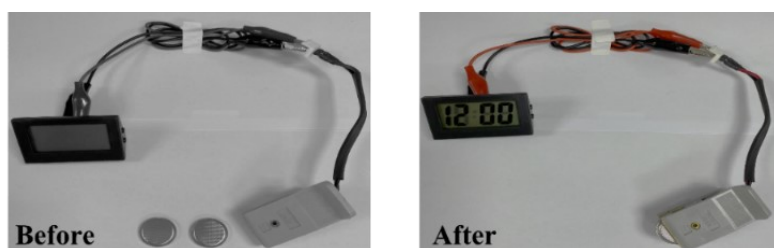

**Figure S21** Digital photographs of Zn//ZVO/Ti<sub>3</sub>C<sub>2</sub>T<sub>x</sub> batteries in series to power a

clock.

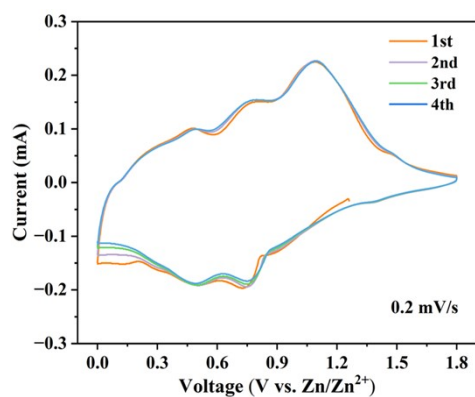

**Figure S22** Cyclic voltammogram profiles of Zn//ZVO/Ti<sub>3</sub>C<sub>2</sub>T<sub>x</sub> batteries at different scan cycles.

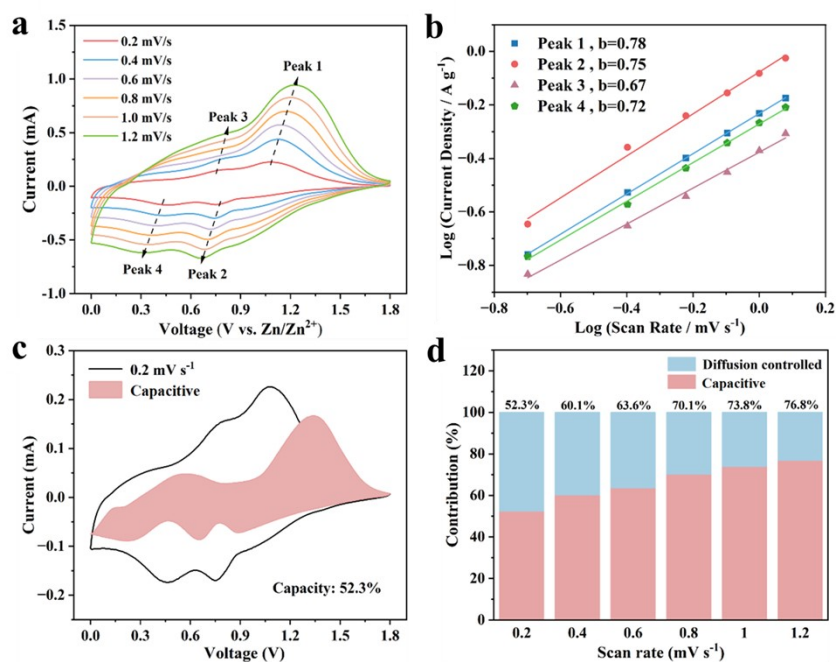

**Figure S23** (a) Cyclic voltammogram profiles of Zn//ZVO batteries at various scan rates. (b) The fitting plots between  $\log(i)$  and  $\log(v)$  at various peak currents. (c) Quantification of the capacitive (red area) and diffusion charge storage in the ZVO/Ti<sub>3</sub>C<sub>2</sub>T<sub>x</sub> electrode at a scan rate of 0.2 mV s<sup>-1</sup> and (d) the ratio of the capacitive contribution (red) to the diffusion contribution (blue) as a function of scan rate.



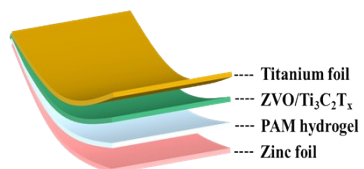

**Figure S24** Scheme of flexible ZIBs based on ZVO/Ti<sub>3</sub>C<sub>2</sub>T<sub>x</sub> composites.

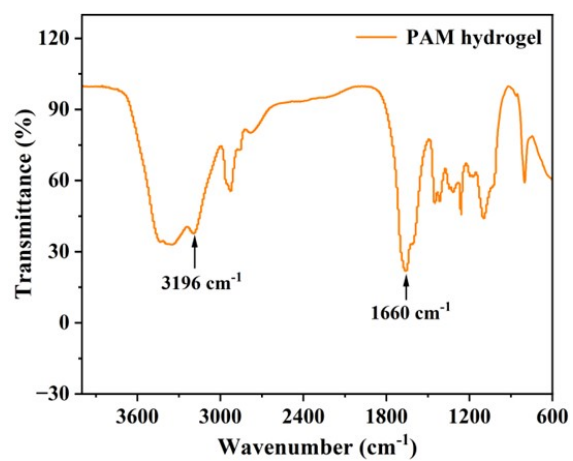

**Figure S25** FT-IR spectra of PAM hydrogel.

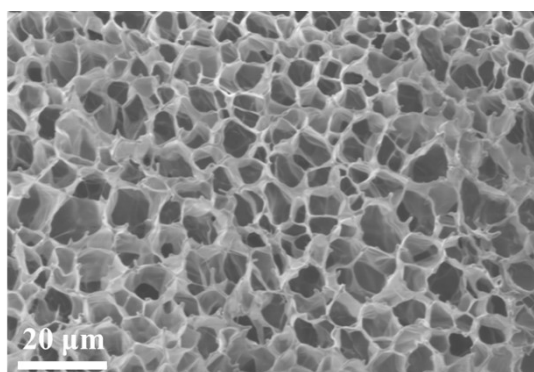

**Figure S26** SEM images of PAM hydrogel.

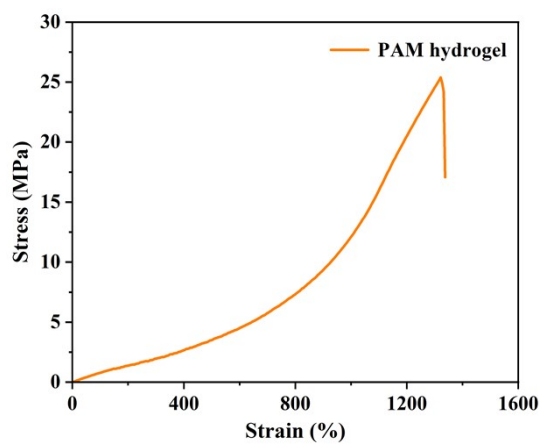

**Figure S27** Stress-strain curve of PAM hydrogel.

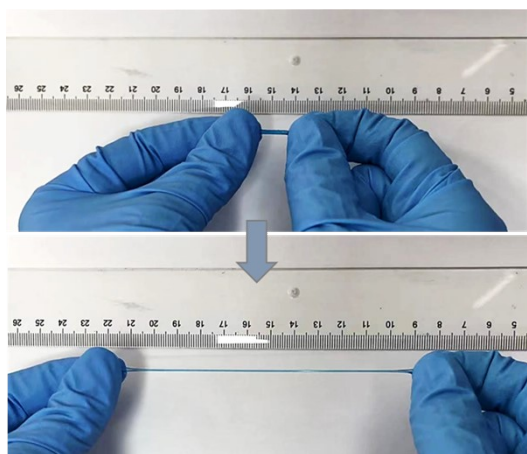

**Figure S28** Digital photographs of stretched PAM hydrogel.

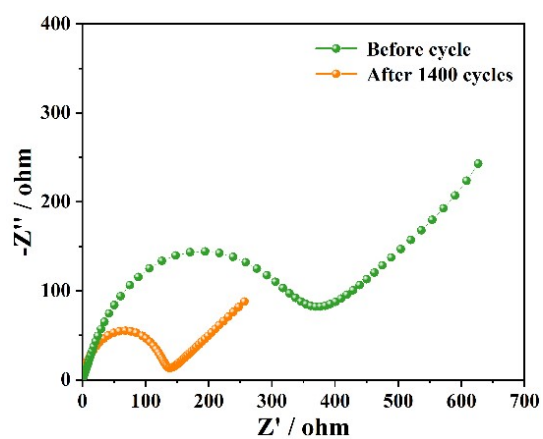

**Figure S29** EIS curves of the flexible ZIBs before and after 1400 charge/discharge cycles.

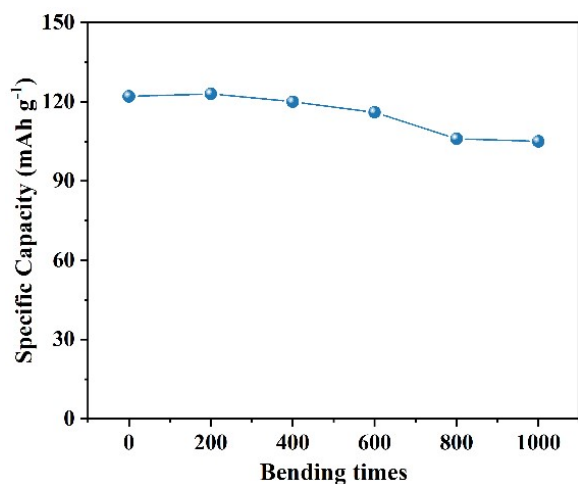

**Figure S30** Specific capacities of flexible ZIBs during bending cycles.

**Table S1** The cycle performance of the recently reported ZVO cathodes of ZIBs.

| Materials                                                 | Voltage range | Zn <sup>2+</sup> diffusion coefficient                                              | Retention | Cycles | Current density       | Ref.      |
|-----------------------------------------------------------|---------------|-------------------------------------------------------------------------------------|-----------|--------|-----------------------|-----------|
| ZVO/Mxene                                                 | 0-1.8 V       | 10 <sup>-7</sup> to 10 <sup>-8</sup> cm <sup>2</sup> s <sup>-1</sup>                | 84%       | 14000  | 10 A g <sup>-1</sup>  | This Work |
|                                                           |               |                                                                                     | 88%       | 1200   | 2 A g <sup>-1</sup>   |           |
|                                                           |               |                                                                                     | 95%       | 60     | 0.1 A g <sup>-1</sup> |           |
| ZVO                                                       | 0.2-1.8 V     | ≈10 <sup>-9</sup> to 10 <sup>-10</sup> cm <sup>2</sup> s <sup>-1</sup>              | 68%       | 300    | 0.2 A g <sup>-1</sup> | 1         |
| HfO <sub>2</sub> -coated ZVO                              | 0.2-1.8 V     |                                                                                     | 84%       | 1000   | 10 A g <sup>-1</sup>  | 2         |
|                                                           |               |                                                                                     | 90%       | 100    | 0.1 A g <sup>-1</sup> |           |
| β-AgVO <sub>3</sub>                                       | 0.4-1.3 V     | 10 <sup>-9</sup> cm <sup>2</sup> s <sup>-1</sup>                                    | 77.86%    | 1000   | 2 A g <sup>-1</sup>   | 3         |
|                                                           |               |                                                                                     | 84%       | 200    | 0.1 A g <sup>-1</sup> |           |
| ZVO NSs@OCNT                                              | 0.2-1.8 V     | ≈10 <sup>-9</sup> to 10 <sup>-10</sup> cm <sup>2</sup> s <sup>-1</sup>              | 75.3%     | 2000   | 5 A cm <sup>-3</sup>  | 4         |
|                                                           |               |                                                                                     | 88.6%     | 2000   | 1 A cm <sup>-3</sup>  |           |
| ZVO nanowires                                             | 0.2-1.8 V     | 10 <sup>-11</sup> to 10 <sup>-10</sup> cm <sup>2</sup> s <sup>-1</sup>              | 77%       | 700    | 2 A g <sup>-1</sup>   | 5         |
| V-doped MnO <sub>2</sub> /ZVO                             | 1.0-1.8 V     |                                                                                     | 99%       | 100    | 0.1 A g <sup>-1</sup> | 6         |
| VEG@MXene                                                 | 0.2-1.6 V     | 10 <sup>-9</sup> to 10 <sup>-10</sup> cm <sup>2</sup> s <sup>-1</sup>               | 85.2%     | 3000   | 10 A g <sup>-1</sup>  | 7         |
|                                                           |               |                                                                                     | 89.7%     | 1000   | 5 A g <sup>-1</sup>   |           |
| V <sub>2</sub> O <sub>3</sub> @C                          | 0.3-1.6 V     | 4.39 × 10 <sup>-10</sup> to 4.15 × 10 <sup>-9</sup> cm <sup>2</sup> s <sup>-1</sup> | 90.7%     | 200    | 0.5 A g <sup>-1</sup> | 8         |
|                                                           |               |                                                                                     | 61.3%     | 1800   | 10 A g <sup>-1</sup>  |           |
| ZVNW-CC                                                   | 0.2-1.6 V     | 10 <sup>-9</sup> to 10 <sup>-11</sup> cm <sup>2</sup> s <sup>-1</sup>               | 96.7%     | 1010   | 1 A g <sup>-1</sup>   | 9         |
|                                                           |               |                                                                                     | 93.7%     | 250    | 0.5 A g <sup>-1</sup> |           |
| Na <sub>5</sub> V <sub>12</sub> O <sub>32</sub> @graphene | 0.2-1.6 V     |                                                                                     | 80%       | 650    | 0.2 A g <sup>-1</sup> | 10        |
|                                                           |               |                                                                                     | 85.7%     | 4400   | 5 A g <sup>-1</sup>   |           |
| V <sub>6</sub> O <sub>13</sub>                            | 0.3-1.4 V     |                                                                                     | 96.4%     | 340    | 0.3 A g <sup>-1</sup> | 11        |
|                                                           |               |                                                                                     | 78.9%     | 1000   | 10 A g <sup>-1</sup>  |           |

## References

1. C. Xia, J. Guo, Y. Lei, H. Liang, C. Zhao and H. N. Alshareef, *Adv. Mater.*, 2018, **30**, 1705580.
2. J. Guo, J. Ming, Y. Lei, W. Zhang, C. Xia, Y. Cui and H. N. Alshareef, *ACS Energy Lett.*, 2019, **4**, 2776-2781.
3. H. Liu, J.-G. Wang, H. Sun, Y. Li, J. Yang, C. Wei and F. Kang, *J. Colloid Interface Sci.*, 2020, **560**, 659-666.
4. Z. Pan, J. Yang, J. Yang, Q. Zhang, H. Zhang, X. Li, Z. Kou, Y. Zhang, H. Chen, C. Yan and J. Wang, *ACS Nano*, 2020, **14**, 842-853.
5. H. Cao, C. Peng, Z. Zheng, Z. Lan, Q. Pan, U. G. Nielsen, P. Norby, X. Xiao and S. Mossin, *Electrochimic. Acta*, 2021, **388**, 138646.
6. L. Ren, G. Yu, H. Xu, W. Wang, Y. Jiang, M. Ji and S. Li, *ACS Sustain. Chem. Eng.*, 2021, **9**, 12223-12232.
7. X. Li, X. Zhu, Z. Cao, Z. Xu, J. Shen and M. Ye, *Small*, 2022, **18**, 2105325.
8. Y. Ma, Y. Qi, Y. Niu, Y. Liu, S. Bao and M. Xu, *Inorg. Chem. Front.*, 2022, **9**, 2706-2713.
9. Y. Cui, Y. Ding, L. Guo, C. Guo, Y. Liu, Y. Bai, G. Li and K. Wang, *Energy Mater.*, 2023, **3**, 300023.
10. L. Rao, Z. Zhou, H. Liu, W. Peng, Y. Li, F. Zhang and X. Fan, *J. Colloid Interface Sci.*, 2023, **629**, 473-481.
11. Y. Li, H. Ba, Z. Wang, S. Wu, Y. Shang, S. Huang and H. Y. Yang, *Mater. Today Energy*, 2024, **39**, 101460.
